# Supplementary material for: HIV-1 escapes from N332-directed antibody neutralization in an elite neutralizer by envelope glycoprotein elongation and introduction of unusual disulfide bonds
Source: PubMed Central journal article supplement (PMC4936165; doi:10.1186/s12977-016-0279-4), 2016-07-07

Additional file 3: Fig. S3

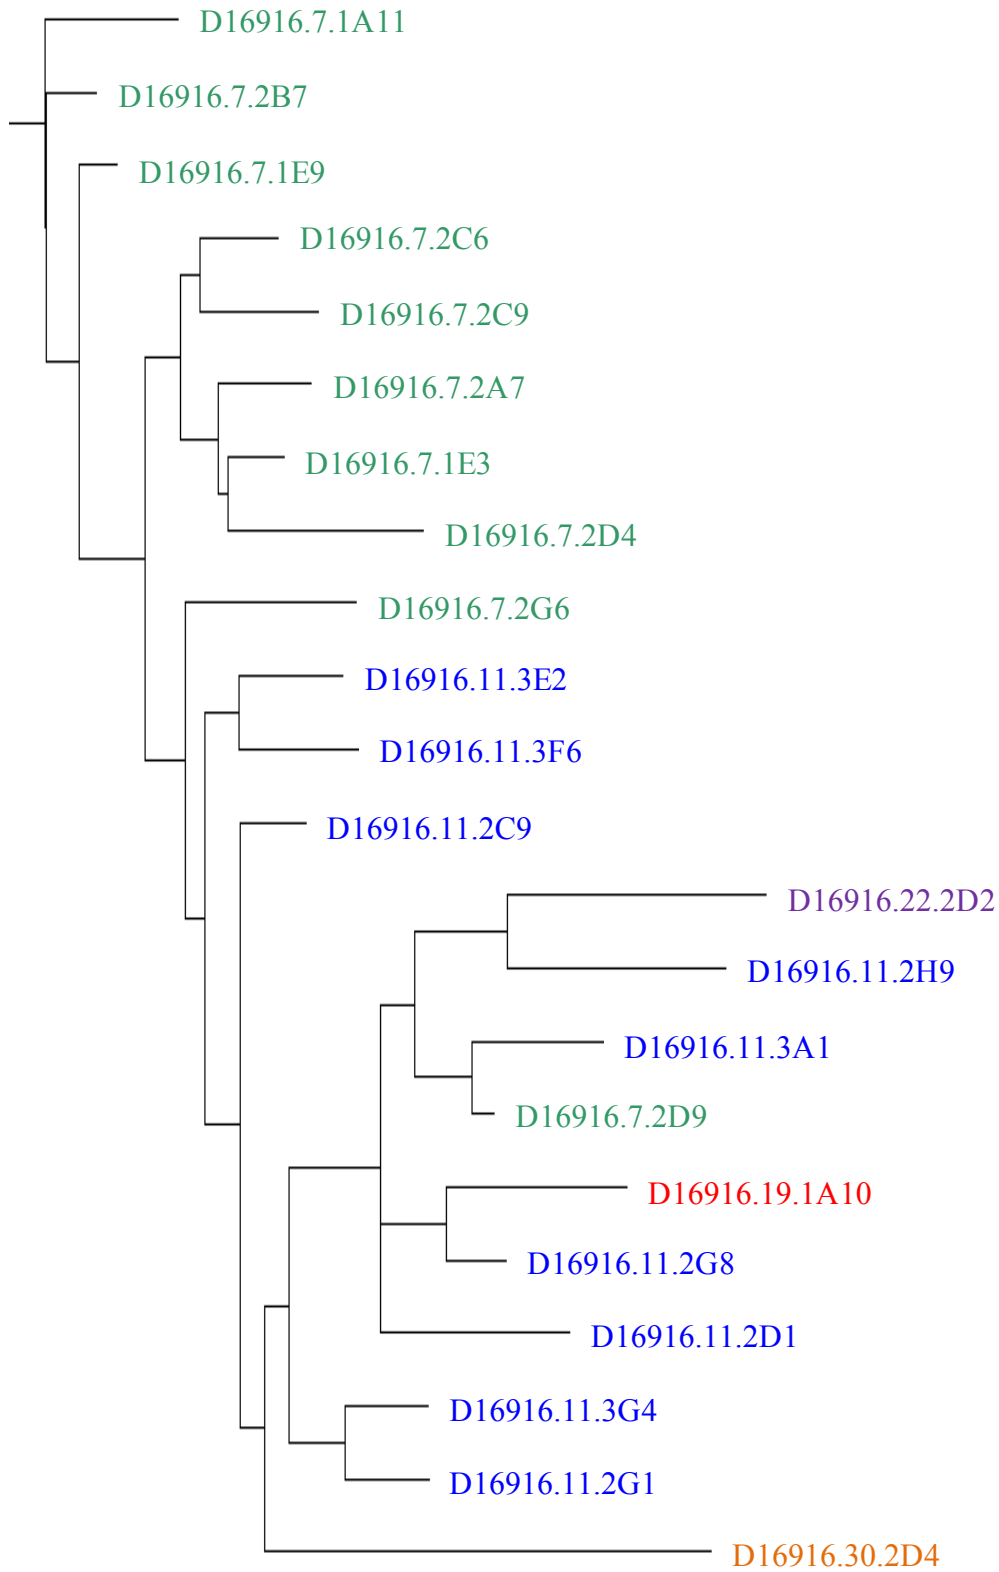

Supplement: 12977_2016_279_MOESM3_ESM.pdf [file 12977_2016_279_MOESM3_ESM.pdf]
